# Supplementary material for: Lawsone Derivatives as Efficient Photopolymerizable Initiators for Free-Radical, Cationic Photopolymerizations, and Thiol—Ene Reactions
Source: MDPI journal article supplement (doi:10.3390/polym13122015), 2021-06-20
Supplement: s1 [file s1]

# Supporting Information

## Lawson Derivatives as Efficient Photopolymerizable Initiators for Free-radical, Cationic Photopolymerizations and Thiol-ene Reactions

Christine Elia<sup>1</sup>, Vlasta Brezova<sup>2</sup>, Pauline Sautrot-Ba<sup>1</sup>, Martin Breza<sup>2</sup>, Davy-Louis Versace<sup>1</sup>

<sup>1</sup>Université Paris-Est Créteil (UPEC), ICMPE–UMR-CNRS 7182, 2-8 rue Henri Dunant, 94320 Thiais, France.

<sup>2</sup>Slovak University of Technology in Bratislava, Institute of Physical Chemistry and Chemical Physics, Department of Physical Chemistry, Radlinského 9, SK-812 37 Bratislava, Slovak Republic.

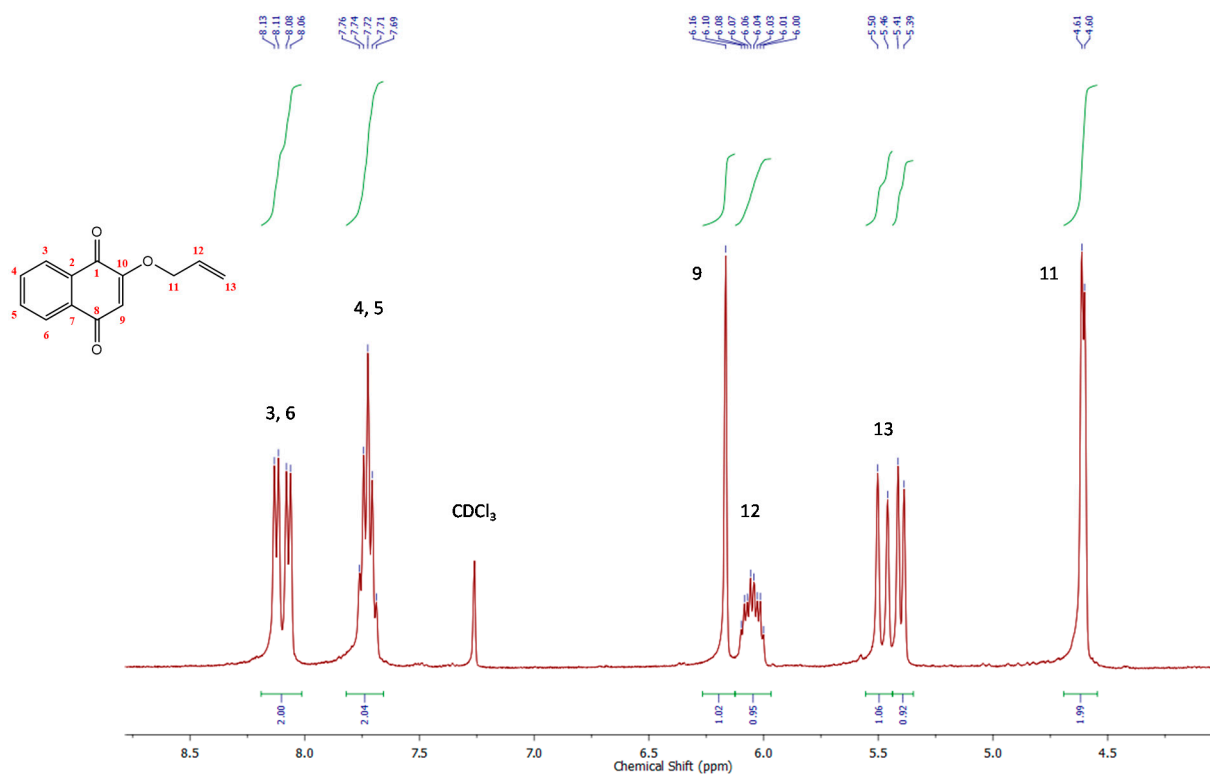

**Figure S1.** <sup>1</sup>H NMR spectrum of HNQA.

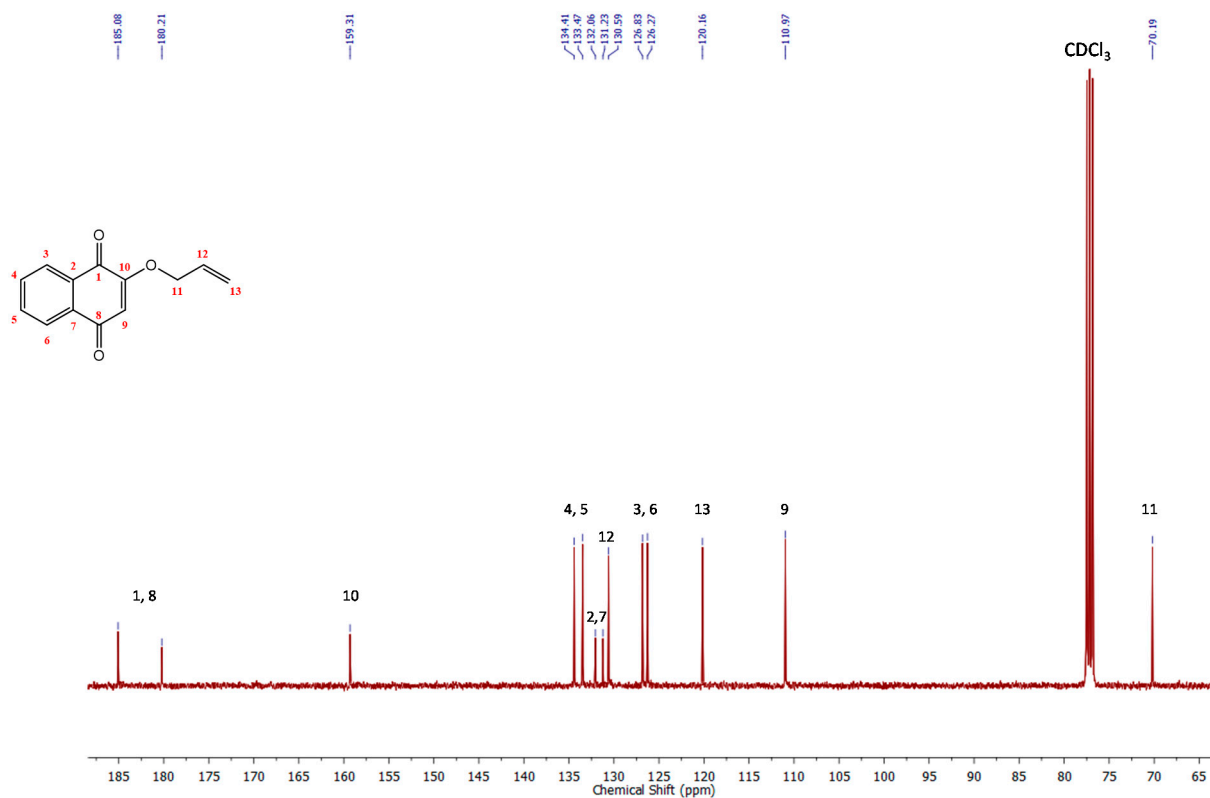

**Figure S2.** <sup>13</sup>C NMR spectrum of HNQA.

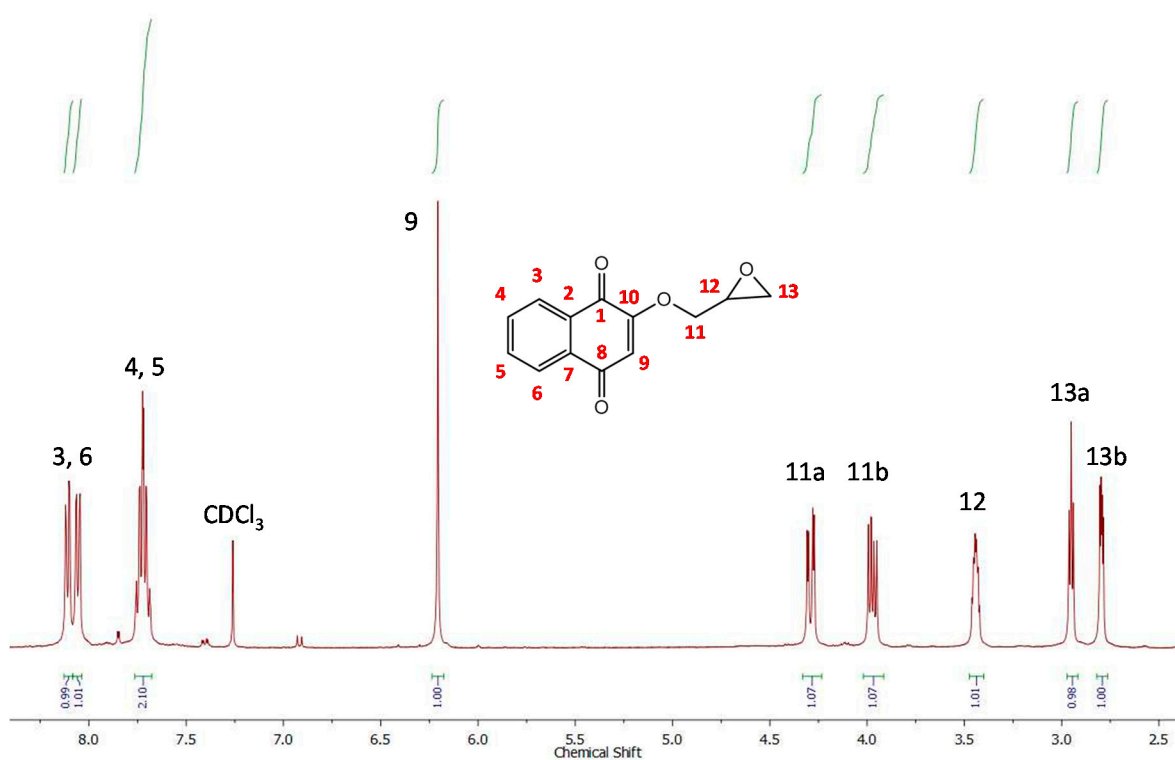

**Figure S3.** <sup>1</sup>H NMR spectrum of HNQE.

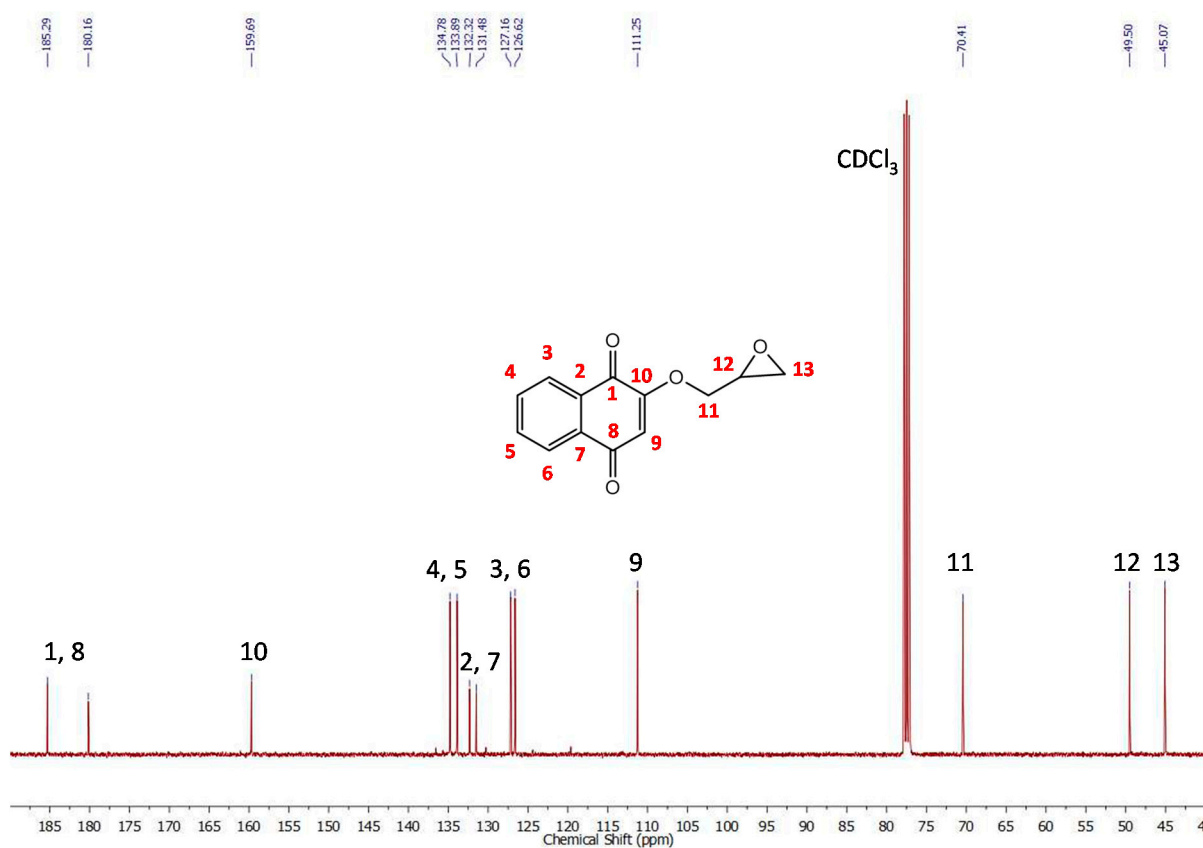

**Figure S4.** <sup>13</sup>C NMR spectrum of HNQE.

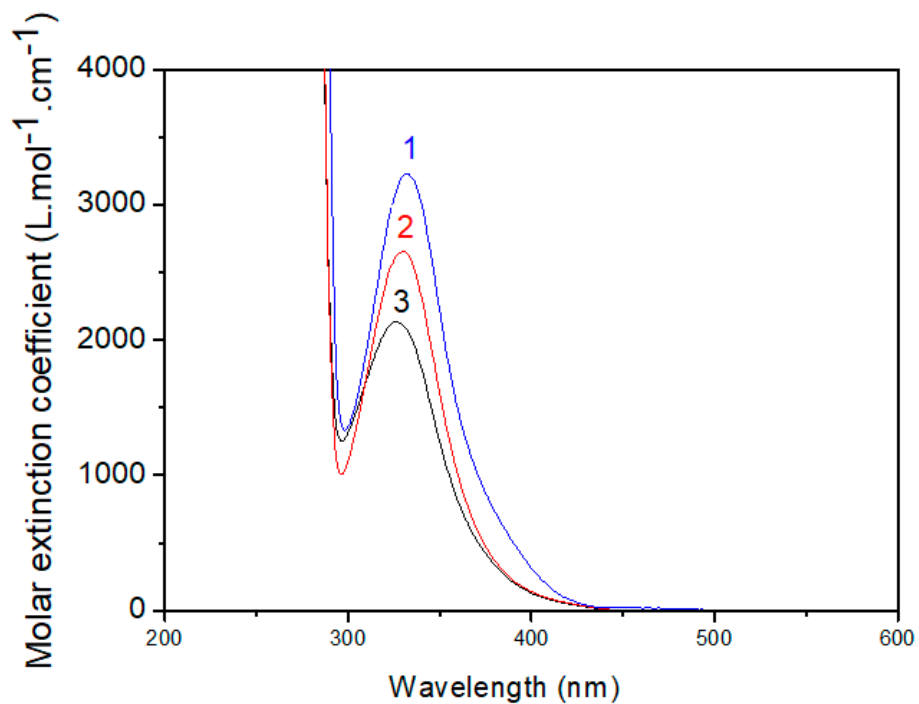

**Figure S5.** Molar extinction coefficient of 1) HNQ, 2) HNQE and 3) HNQA in ACN.

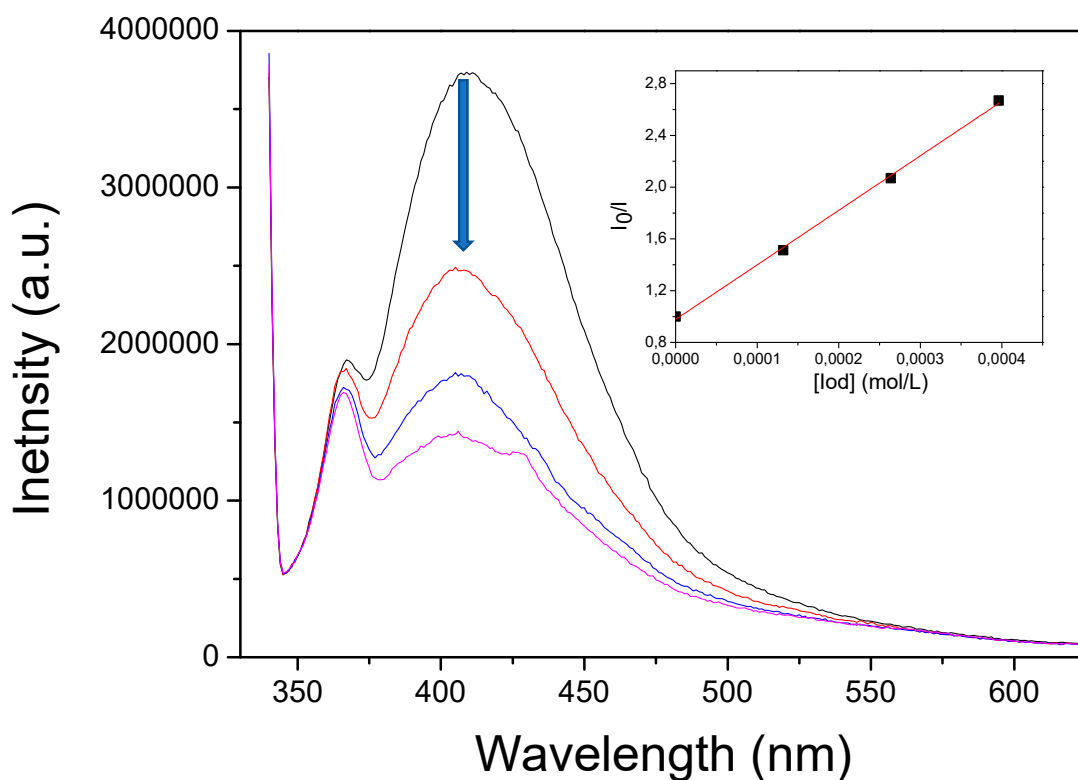

**Figure S6.** Fluorescence quenching of HNQA upon gradual addition of Iod in ACN. **Insert:** Stern-Volmer plot  $I_0/I$  as a function of the concentration of Iod for the calculation of the fluorescence quenching constants  $K_{sv}$ .

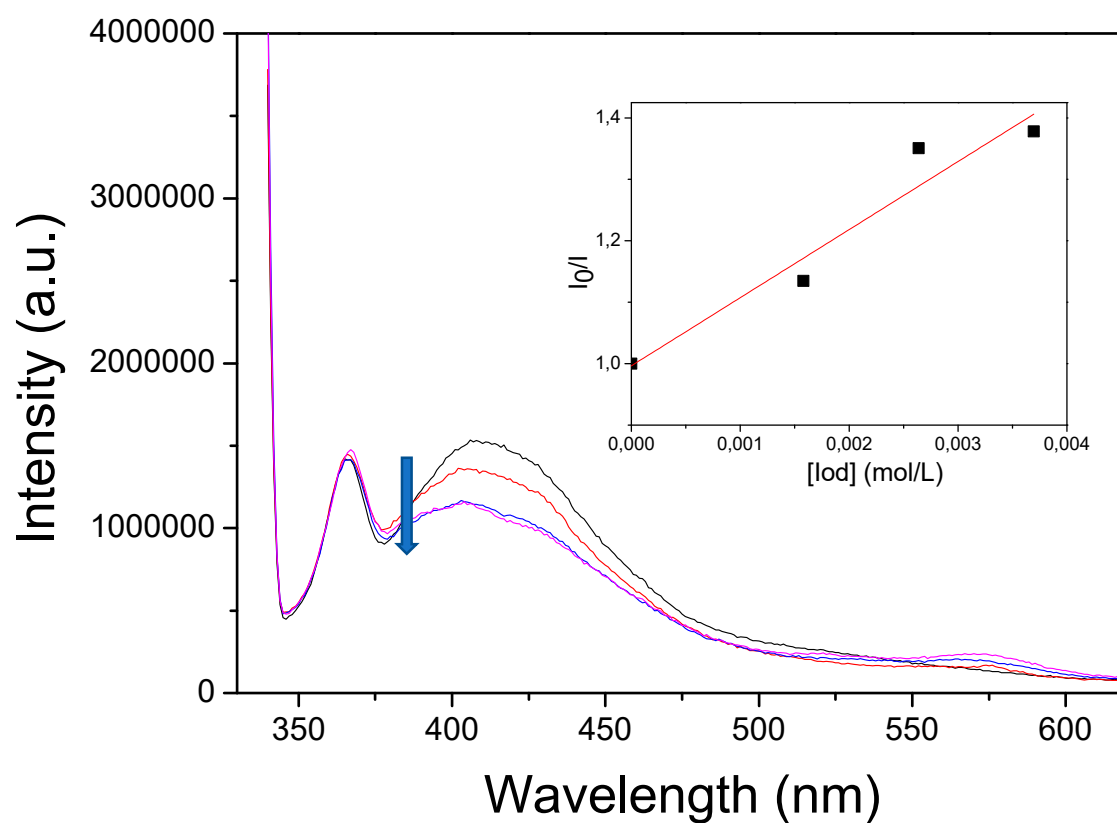

**Figure S7.** Fluorescence quenching of **HNQE** upon gradual addition of Iod in ACN. **Insert:** Stern-Volmer plot  $I_0/I$  as a function of the concentration of Iod for the calculation of the fluorescence quenching constants  $K_{SV}$ .

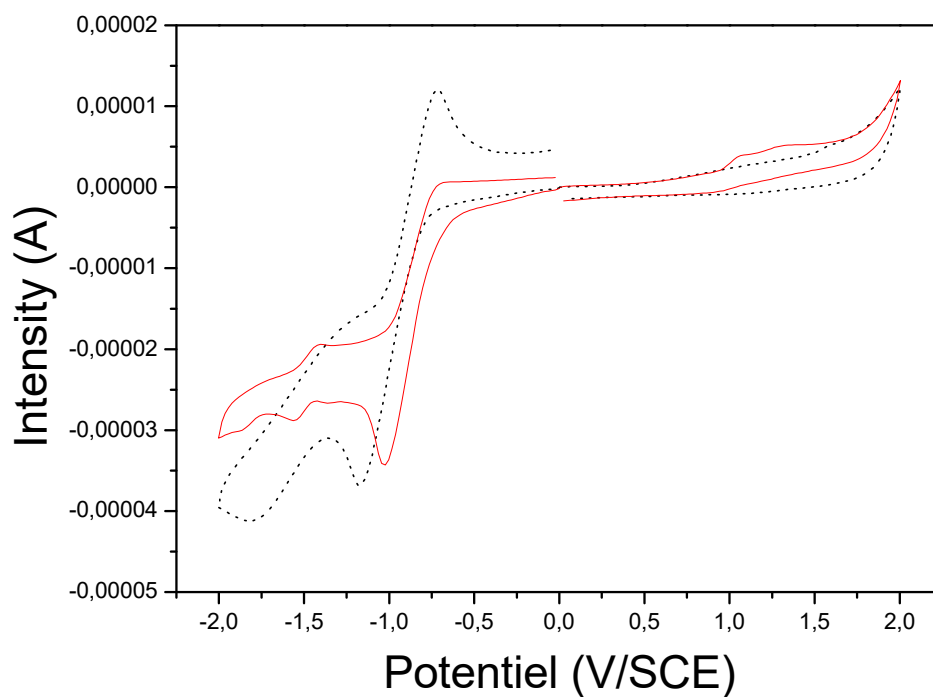

**Figure S8.** Cyclic voltammogram of **HNQA** in ACN +  $10^{-3}$  M tetraethylammonium tetrafluoroborate measured at a scan rate of 100 mV/s.  $[\text{HNQA}] = 10^{-3}$  M.

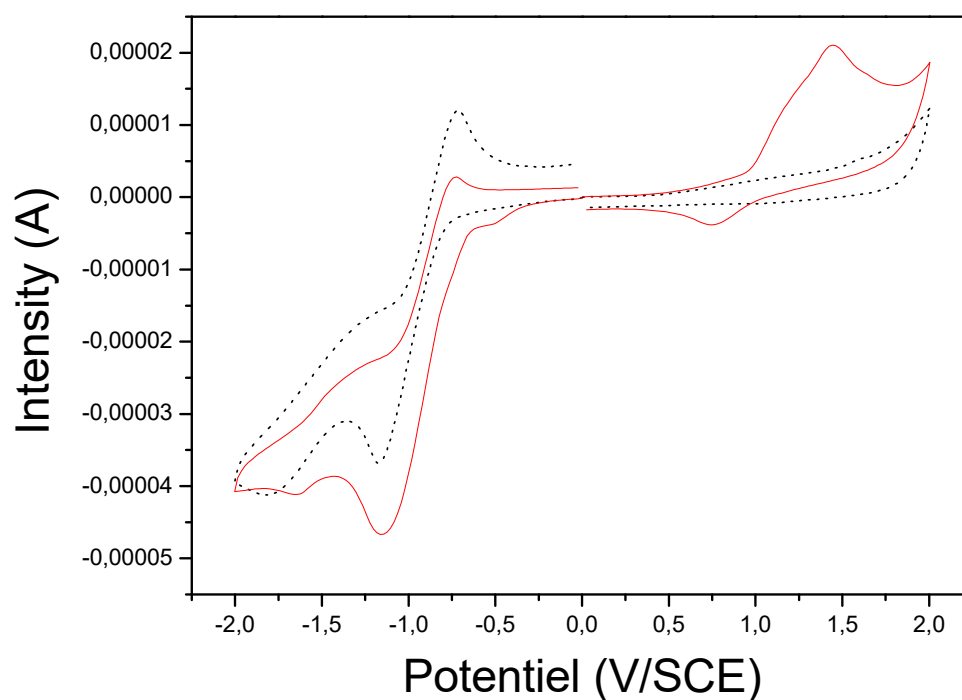

**Figure S9.** Cyclic voltammogram of **HNQE** in ACN +  $10^{-3}$  M tetraethylammonium tetrafluoroborate measured at a scan rate of 100 mV/s.  $[\text{HNQE}] = 10^{-3}$  M.

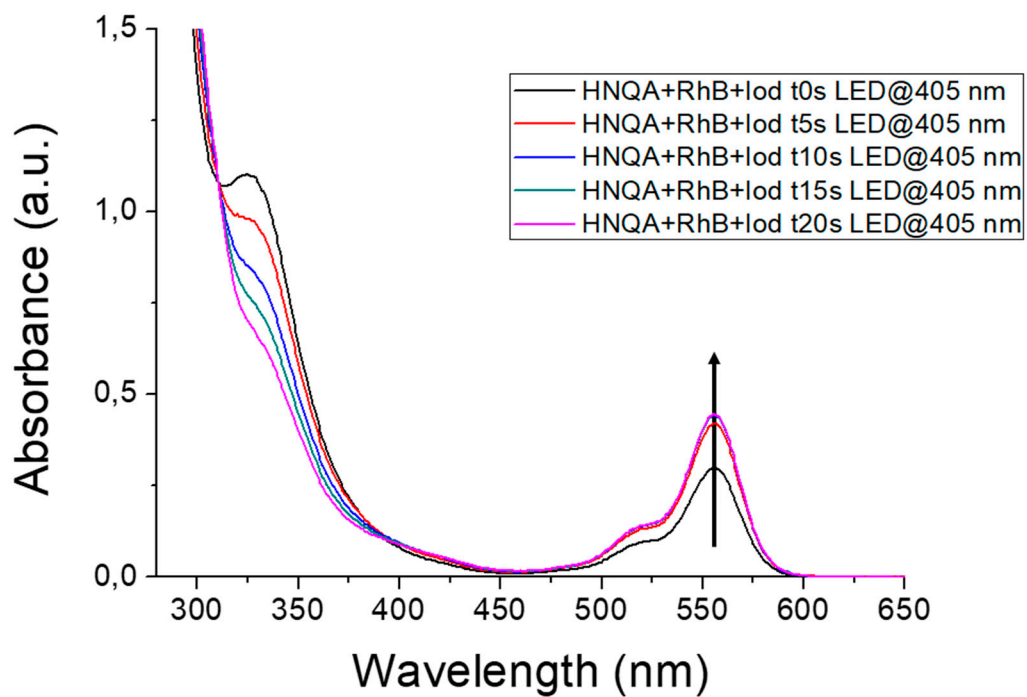

**Figure S10.** Steady-state photolysis of **HNQA**/Iod/rhodamine B in ACN after irradiation by LED@405 nm (60 mW/cm<sup>2</sup>) under air conditions. [**HNQA**] =  $5 \times 10^{-4}$  M, [Iod] =  $1.7 \times 10^{-3}$  M and [RhB] =  $3.10^{-6}$  M.
